# Supplementary material for: Using Big Data Analytics to “Back Engineer” Protein Conformational Selection Mechanisms
Source: MDPI journal article supplement (doi:10.3390/molecules27082509), 2022-04-13
Supplement: s1 [file s1]

Article

# Using Big Data Analytics to “Back Engineer” Protein Conformational Selection Mechanisms.

Shivangi Gupta <sup>1</sup>, Jerome Baudry <sup>2</sup>, and Vineetha Menon <sup>1,\*</sup>

**Table S1.** Classification table of ADORA2A with a training size of 30%

| Class 0 (number of non-binding conformations) samples |         | Class 1 (number of binding conformations) samples |         | Classifier   | TP  | FN  | Accuracy (%) | Sensitivity (%) |
|-------------------------------------------------------|---------|---------------------------------------------------|---------|--------------|-----|-----|--------------|-----------------|
| Training                                              | Testing | Training                                          | Testing |              |     |     |              |                 |
| 652                                                   | 1498    | 248                                               | 602     | LR+SMOTE-GB  | 345 | 257 | 56.0         | 57.0            |
|                                                       |         |                                                   |         | LR+SMOTE-KNN | 479 | 123 | 47.0         | 80.0            |

**Table S2.** Classification table of ADRB2 with a training size of 30%

| Class 0 (number of non-binding conformations) samples |         | Class 1 (number of binding conformations) samples |         | Classifier   | TP | FN | Accuracy (%) | Sensitivity (%) |
|-------------------------------------------------------|---------|---------------------------------------------------|---------|--------------|----|----|--------------|-----------------|
| Training                                              | Testing | Training                                          | Testing |              |    |    |              |                 |
| 719                                                   | 1692    | 50                                                | 104     | LR+SMOTE-GB  | 21 | 83 | 82.5         | 20.0            |
|                                                       |         |                                                   |         | LR+SMOTE-KNN | 34 | 70 | 67.1         | 33.0            |

**Table S3.** Classification table of OPRK1 with a training size of 30%

| Class 0 (number of non-binding conformations) samples |         | Class 1 (number of binding conformations) samples |         | Classifier | TP | FN | Accuracy (%) | Sensitivity (%) |
|-------------------------------------------------------|---------|---------------------------------------------------|---------|------------|----|----|--------------|-----------------|
| Training                                              | Testing | Training                                          | Testing |            |    |    |              |                 |

---

|     |      |    |    |              |    |    |      |      |
|-----|------|----|----|--------------|----|----|------|------|
| 858 | 2004 | 41 | 96 | LR+SMOTE-GB  | 54 | 42 | 57.6 | 56.0 |
|     |      |    |    | LR+SMOTE-KNN | 47 | 49 | 57.6 | 49.0 |
